# Supplementary material for: Immunosenescence of the CD8+ T cell compartment is associated with HIV-infection, but only weakly reflects age-related processes of adipose tissue, metabolism, and muscle in antiretroviral therapy-treated HIV-infected patients and controls
Source: Springer Nature journal article supplement (doi:10.1186/s12865-015-0136-6), 2015-11-26

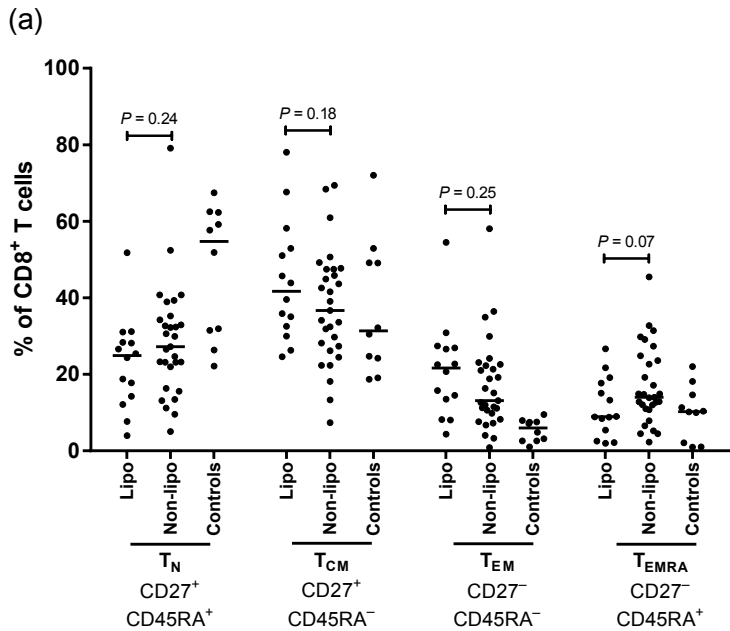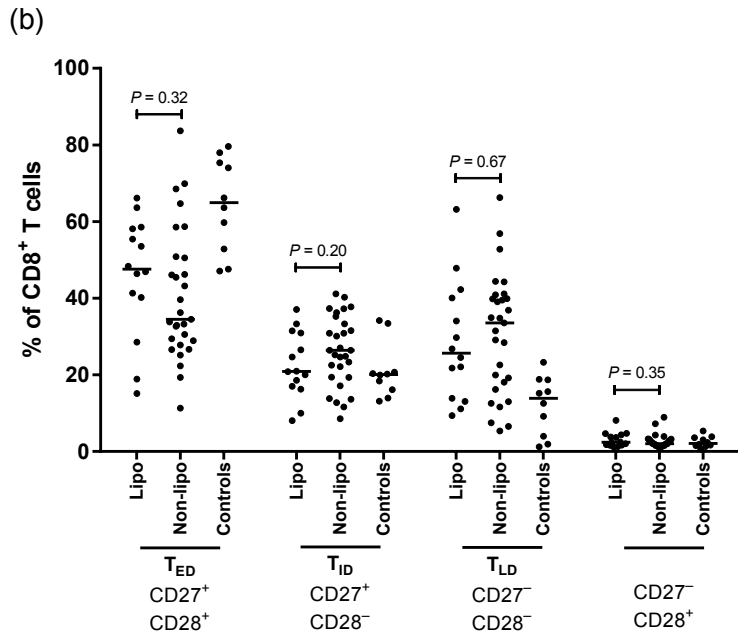

Supplement: MOESM1 [file 9736220]
